# Supplementary material for: Piconewton Mechanical Forces Promote Neurite Growth
Source: PubMed Central journal article supplement — Biophys J. 2018 Oct 16;115(10):2026–33. doi: 10.1016/j.bpj.2018.10.009 (PMC6303536; doi:10.1016/j.bpj.2018.10.009), 2018-10-16
Supplement: mmc1.pdf [file mmc1.pdf]

**Biophysical Journal, Volume 115**

**Supplemental Information**

**Piconewton Mechanical Forces Promote Neurite Growth**

**Vittoria Raffa, Francesca Falcone, Sara De Vincentiis, Alessandro Falconieri, Maria P. Calatayud, Gerardo F. Goya, and Alfred Cuschieri**

## Supplementary Materials

**Table S1.** Set of genes known to be expressed in NGF differentiated PC12 cells

|          |                    |
|----------|--------------------|
| Dclk1    | ENSRNOG00000032922 |
| Sik1     | ENSRNOG00000001189 |
| Serpine1 | ENSRNOG00000001414 |
| Vgf      | ENSRNOG00000001416 |
| Rgs2     | ENSRNOG00000003687 |
| Arl4a    | ENSRNOG00000004282 |
| Rdh10    | ENSRNOG00000006681 |
| Ptgs1    | ENSRNOG00000007415 |
| Mmp13    | ENSRNOG00000008478 |
| Apha2    | ENSRNOG00000009222 |
| Ripply2  | ENSRNOG00000010004 |
| Tph1     | ENSRNOG00000011672 |
| F3       | ENSRNOG00000011800 |
| Sgk1     | ENSRNOG00000011815 |
| Tmem95   | ENSRNOG00000015669 |
| Mafb     | ENSRNOG00000016037 |
| Fzd4     | ENSRNOG00000016848 |
| Egr3     | ENSRNOG00000017828 |
| Hbegf    | ENSRNOG00000018646 |
| PVR      | ENSRNOG00000019202 |
| Fosl1    | ENSRNOG00000020552 |
| Sprr1a   | ENSRNOG00000024028 |
| Sprr1b   | ENSRNOG00000031144 |
| Mmp3     | ENSRNOG00000032626 |
| Mmp10    | ENSRNOG00000032832 |
| Csrnp1   | ENSRNOG00000033433 |
| Kdm6b    | ENSRNOG00000037613 |
| Plaur    | ENSRNOG00000037931 |
| Prss22   | ENSRNOG00000039698 |
| Arc      | ENSRNOG00000043465 |
| Fosb     | ENSRNOG00000046667 |
| Ifrd1    | ENSRNOG00000050997 |
| Cited2   | ENSRNOG00000056940 |

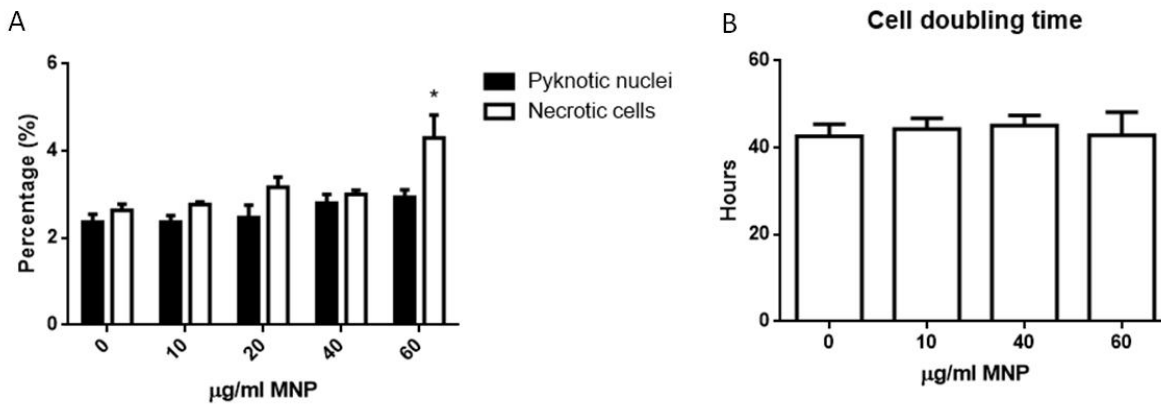

**Fig. S1.** PC12 cells were incubated by adding MNPs to the cell growth medium at the final concentration of 0, 10, 20, 40 or 60  $\mu\text{g ml}^{-1}$  for 72 h. No difference was found in the fraction of pyknotic cells and in cell doubling time at any dose tested. Additionally, the percentage of necrotic cells was always below the 5%, being significantly different from the control only at the highest concentration tested. A) Necrosis was calculated as percentage of PI positive cells. 1-way ANOVA test followed by Bonferroni correction,  $n=3$ ,  $p=0.01$ . Pyknotic nuclei were evaluated by DAPI staining. ANOVA test followed by Bonferroni correction,  $n=3$ ,  $p=0.23$ . B) Cell doubling time.  $n=3$ , 1-way ANOVA test,  $p=0.95$ .

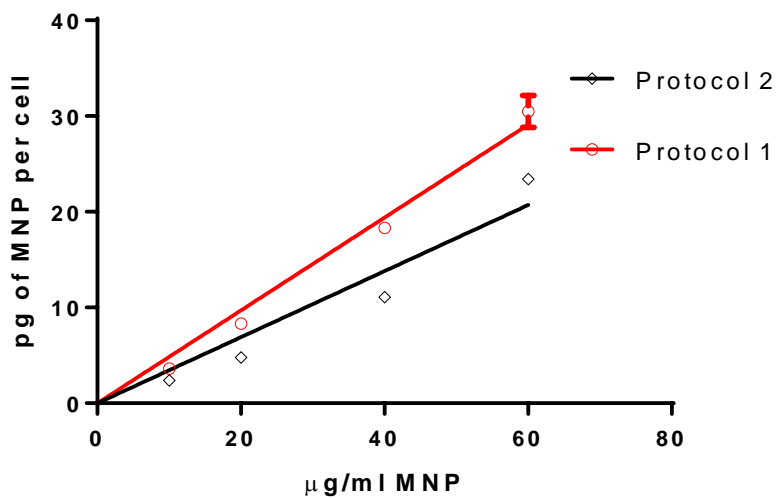

**Fig. S2.** MNP cell labelling. Protocol 1: cells cultured for 96 h in differentiation medium supplemented with MNPs.  $N=6$ , linear regression analysis,  $R^2=0.94$ . Protocol 2: cells cultured for 48 h in cell growth medium supplemented with MNPs and then 96 hours in differentiation medium.  $N=6$ , linear regression analysis,  $R^2=0.99$ .

**Table S2.** Neurite number per cell.  $N=100$ . Kruskal Wallis test followed by HDS correction.

|                           | M <sup>-</sup> MNP <sup>-</sup> | M <sup>+</sup> MNP <sup>-</sup> | M <sup>-</sup> MNP <sup>+</sup> | M <sup>+</sup> MNP <sup>+</sup> | P value |
|---------------------------|---------------------------------|---------------------------------|---------------------------------|---------------------------------|---------|
| 3.4 pg MNP, 72 h stretch  | 2.34±0.12                       | 2.27±0.11                       | 2.270±0.11                      | 2.47±0.13                       | 0.765   |
| 4.8 pg MNP, 72 h stretch  | 2.36±0.10                       | 2.42±0.12                       | 2.30±0.11                       | 2.58±0.12                       | 0.490   |
| 3.4 pg MNP, 120 h stretch | 3.12±0.12                       | 2.97±0.12                       | 3.22±0.13                       | 3.65±0.13 <sup>*,##</sup>       | 0.001   |
| NGF 2 h                   | 2.02±0.10                       | 2.34±0.12                       | 2.14±0.11                       | 2.45±0.11 <sup>*</sup>          | 0.027   |
